# Supplementary material for: Micropatterned immobilization of membrane-mimicking polymer and peptides for regulation of cell behaviorsin vitro
Source: Royal Society of Chemistry journal article supplement (doi:10.1039/c8ra02607f), 2018-01-01
Supplement: c8ra02607f1.pdf [file c8ra02607f1.pdf]

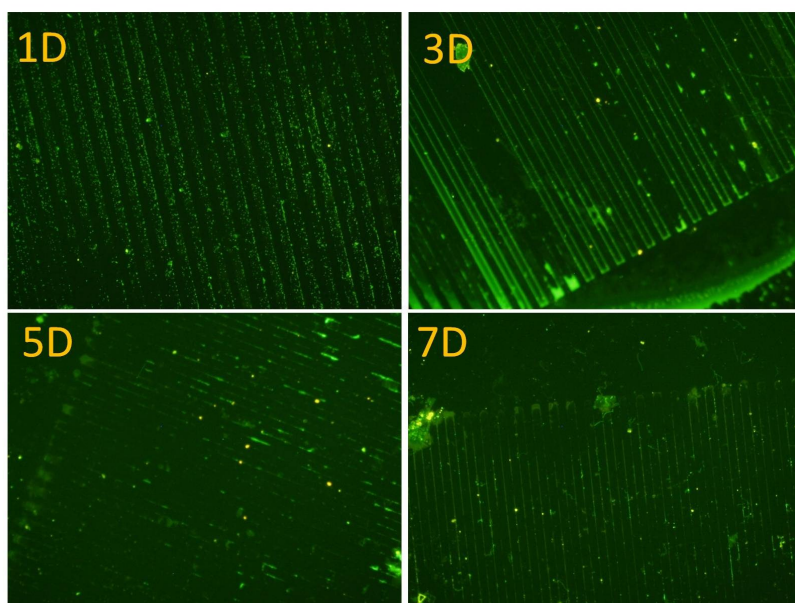

Fig. S1 Sample of Ti-PDA-M(P) was immersed in deionized water for 1, 3, 5 and 7 days (1D, 3D, 5D and 7D), and the polymer of MPC (PMMP-PC-HD) was stained with rhodamine.

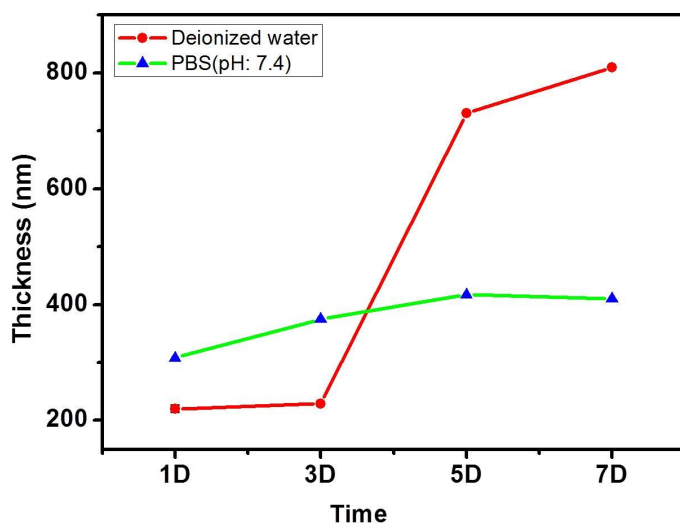

Fig. S2. Thickness of Ti-PDA-M(P) was immersed in deionized water and PBS(pH: 7.4) for 1, 3, 5 and 7 days (1D, 3D, 5D and 7D).
